# Supplementary material for: Low Efficacy of Genetic Tests for the Diagnosis of Primary Lymphedema Prompts Novel Insights into the Underlying Molecular Pathways
Source: MDPI journal article supplement (doi:10.3390/ijms23137414), 2022-07-03
Supplement: s1 [file s1]

## — Supplementary Material —

# Low efficacy of genetic tests for the diagnosis of primary lymphedema prompts novel insights into the underlying molecular pathways

Gabriele Bonetti <sup>1,\*</sup>, Stefano Paolacci <sup>1</sup>, Michele Samaja <sup>2</sup>, Paolo Enrico Maltese <sup>1</sup>, Sandro Micheleni <sup>3</sup>, Serena Micheleni <sup>4</sup>, Silvia Micheleni <sup>5</sup>, Maurizio Ricci <sup>6</sup>, Marina Cestari <sup>7,8</sup>, Astrit Dautaj <sup>1</sup>, Maria Chiara Medori <sup>1</sup>, Matteo Bertelli <sup>1,2,9</sup>

- 1 MAGI's LAB, Rovereto 38068, Italy; [stefano.paolacci@assomagi.org](mailto:stefano.paolacci@assomagi.org) (S.P.); [paolo.maltese@assomagi.org](mailto:paolo.maltese@assomagi.org) (P.E.M.); [astrit.dautaj@assomagi.org](mailto:astrit.dautaj@assomagi.org) (A.D.); [chiara.medori@assomagi.org](mailto:chiara.medori@assomagi.org) (M.C.M.); [matteo.bertelli@assomagi.org](mailto:matteo.bertelli@assomagi.org) (M.B.)
- 2 MAGI Group, San Felice del Benaco 25010, Italy; [michele.samaja@assomagi.org](mailto:michele.samaja@assomagi.org)
- 3 Vascular Diagnostics and Rehabilitation Service, Marino Hospital, ASL Roma 6, Marino 00047, Italy; [sandro.micheleni@aslroma6.it](mailto:sandro.micheleni@aslroma6.it)
- 4 Unit of Physical Medicine, "Sapienza" University of Rome, Rome 00185, Italy; [serenamicheleni@gmail.com](mailto:serenamicheleni@gmail.com)
- 5 Neurosurgery, University of Tor Vergata, Rome 00133, Italy; [silviamicheleni1992@gmail.com](mailto:silviamicheleni1992@gmail.com)
- 6 Division of Rehabilitation Medicine, Azienda Ospedaliero-Universitaria, Ospedali Riuniti di Ancona, Ancona 60126, Italy; [maurizio.ricci@ospedali riuniti.marche.it](mailto:maurizio.ricci@ospedali riuniti.marche.it)
- 7 Study Centre Pianeta Linfedema, Terni 05100, Italy; [cestari.marina@libero.it](mailto:cestari.marina@libero.it)
- 8 Lymphology Sector of the Rehabilitation Service, USL Umbria2, Terni 05100, Italy; [cestari.marina@libero.it](mailto:cestari.marina@libero.it)
- 9 MAGI Euregio, Bolzano 39100, Italy

\* Correspondence: [gabriele.bonetti@assomagi.org](mailto:gabriele.bonetti@assomagi.org); Tel.: +39-0365-62-061

### List of diagnostic and candidate genes

**Table S1.** List of diagnostic genes for primary lymphedema. Name of the gene, OMIM number, gene-phenotype relationship, relative reference and inheritance, involved pathway, relative reference and effect on the pathway are reported. References are from OMIM, Kegg, or literature.

| Gene    | OMIM   | Gene-Phenotype relationship                                                    | Reference | Inheritance | Pathways             | Reference | Effect       |
|---------|--------|--------------------------------------------------------------------------------|-----------|-------------|----------------------|-----------|--------------|
| ADAMTS3 | 605011 | Hennekam lymphangiectasia-lymphedema syndrome 3                                | 618154    | AR          | VEGFR3 pathway       | [24]      | Activation   |
| AKT1    | 164730 | Proteus syndrome, somatic                                                      | 176920    |             | Ras pathway          | map04014  | Inactivation |
|         |        |                                                                                |           |             | PI3K/AKT pathway     | map04151  | Activation   |
| BRAF    | 164757 | Noonan syndrome 7                                                              | 613706    | AD          | MAPK pathway         | map04010  | Activation   |
| CBL     | 165360 | Noonan syndrome-like disorder with or without juvenile myelomonocytic leukemia | 613563    | AD          | Ras pathway          | [116]     | Inactivation |
| CCBE1   | 612753 | Hennekam lymphangiectasia-lymphedema syndrome 1                                | 235510    | AR          | VEGFR3 pathway       | [21]      | Activation   |
| CELSR1  | 604523 | Lymphatic malformation 9                                                       | 619319    | AD          | Planar cell polarity | [117]     | Activation   |
| EPHB4   | 600011 | Capillary malformation-arteriovenous malformation 2                            | 618196    | AD          | Ras pathway          | [118]     | Inactivation |
|         |        | Lymphatic malformation 7                                                       | 617300    | AD          |                      |           |              |
| FAT4    | 612411 | Hennekam lymphangiectasia-lymphedema syndrome 2                                | 616006    | AR          | Planar cell polarity | [89]      | Activation   |
| FLT4    | 136352 | Lymphatic malformation 1                                                       | 153100    | AD          | Ras pathway          | map04014  | Activation   |
|         |        |                                                                                |           |             | PI3K/AKT pathway     | map04151  | Activation   |

|               |        |                                                                                   |        |    |                             |          |              |
|---------------|--------|-----------------------------------------------------------------------------------|--------|----|-----------------------------|----------|--------------|
| <b>FOXC2</b>  | 602402 | Lymphedema-distichiasis syndrome                                                  | 153400 | AD | Transcription factors       | [75]     | Activation   |
| <b>GATA2</b>  | 137295 | Emberger syndrome                                                                 | 614038 | AD | Transcription factors       | [12]     | Activation   |
| <b>GJA1</b>   | 121014 | Oculodentodigital dysplasia                                                       | 164200 |    | Lymphatic valve development | [91]     | Activation   |
| <b>GJC2</b>   | 608803 | Lymphatic malformation 3                                                          | 613480 | AD | Lymphatic valve development | [92]     | Activation   |
| <b>HGF</b>    | 142409 | Primary lymphedema                                                                | [8]    |    | Ras pathway                 | map04014 | Activation   |
|               |        |                                                                                   |        |    | PI3K/AKT pathway            | map04151 | Activation   |
| <b>HRAS</b>   | 190020 | Costello syndrome                                                                 | 218040 | AD | Ras pathway                 | map04014 | Activation   |
|               |        |                                                                                   |        |    | PI3K/AKT pathway            | map04151 | Activation   |
| <b>KIF11</b>  | 148760 | Microcephaly with or without chorioretinopathy, lymphedema, or mental retardation | 152950 | AD | PI3K/AKT pathway            | [119]    | Activation   |
| <b>KRAS</b>   | 190070 | Noonan syndrome 3                                                                 | 609942 | AD | Ras pathway                 | map04014 | Activation   |
|               |        |                                                                                   |        |    | PI3K/AKT pathway            | map04151 | Activation   |
| <b>NRAS</b>   | 164790 | Noonan syndrome 6                                                                 | 613224 | AD | Ras pathway                 | map04014 | Activation   |
|               |        |                                                                                   |        |    | PI3K/AKT pathway            | map04151 | Activation   |
| <b>PIEZO1</b> | 611184 | Lymphatic malformation 6                                                          | 616843 | AR | PI3K/AKT pathway            | [120]    | Activation   |
|               |        |                                                                                   |        |    | Lymphatic valve development | [94]     | Activation   |
| <b>PIK3CA</b> | 171834 | CLAPO syndrome, somatic                                                           | 613089 |    | Ras pathway                 | map04014 | Activation   |
|               |        | CLOVE syndrome, somatic                                                           | 612918 |    | PI3K/AKT pathway            | map04151 | Activation   |
| <b>PTPN11</b> | 176876 | Noonan syndrome 1                                                                 | 163950 | AD | Ras pathway                 | map04014 | Activation   |
|               |        |                                                                                   |        |    | PI3K/AKT pathway            | [121]    | Activation   |
| <b>PTPN14</b> | 603155 | Choanal atresia and lymphedema                                                    | 613611 | AR | VEGFR3 pathway              | [25]     | Activation   |
| <b>RASA1</b>  | 139150 | Capillary malformation-arteriovenous malformation 1                               | 608354 | AD | Ras pathway                 | map04014 | Inactivation |
| <b>RIT1</b>   | 609591 | Noonan syndrome 8                                                                 | 615355 | AD | Ras pathway                 | [50]     | Activation   |
| <b>SHOC2</b>  | 602775 | Noonan syndrome-like with loose anagen hair 1                                     | 607721 | AD | Ras pathway                 | map04014 | Activation   |
| <b>SOS1</b>   | 182530 | Noonan syndrome 4                                                                 | [122]  | AD | Ras pathway                 | map04014 | Activation   |
|               |        |                                                                                   |        |    | PI3K/AKT pathway            | map04151 | Activation   |
| <b>SOX18</b>  | 601618 | Hypotrichosis-lymphedema-telangiectasia syndrome                                  | 607823 | AR | Transcription factors       | [12]     | Activation   |
|               |        | Hypotrichosis-lymphedema-telangiectasia-renal defect syndrome                     | 137940 | AD |                             |          |              |
| <b>VEGFC</b>  | 601528 | Lymphatic malformation 4                                                          | 615907 | AD | Ras pathway                 | map04014 | Activation   |
|               |        |                                                                                   |        |    | PI3K/AKT pathway            | map04151 | Activation   |

**Table S2.** List of candidate genes for primary lymphedema. Name of the gene, OMIM number, gene-phenotype relationship, relative reference and inheritance, involved pathway, relative reference and effect on the pathway are reported. References are from OMIM, Kegg, or literature.

| Gene      | OMIM   | Gene-Phenotype relationship            | Reference | Inheritance | Pathways                                 | Reference | Effect       |
|-----------|--------|----------------------------------------|-----------|-------------|------------------------------------------|-----------|--------------|
| ACKR2     | 602648 | Lymphatic vascular development         | [105]     |             | Macrophage recruitment/activation        | [105]     | Activation   |
| ADM       | 103275 | Lymphatic vascular development         | [123]     |             | Ras pathway                              | [124]     | Activation   |
|           |        | Predisposition to secondary lymphedema | [125]     |             | PI3K/AKT pathway                         | [124]     | Activation   |
|           |        |                                        |           |             | Vascular smooth muscle contraction       | map04270  | Activation   |
| ANGPT2    | 601922 | Lymphatic malformation 10              | 619369    | AD          | Ras pathway                              | map04014  | Inactivation |
|           |        |                                        |           |             | PI3K/AKT pathway                         | map04151  | Inactivation |
| ANGPTL4   | 605910 | Lymphatic vascular development         | [126]     |             | Rho and cytoskeletal remodelling pathway | [127]     | Activation   |
|           |        |                                        |           |             | PI3K/AKT pathway                         | [128]     | Inactivation |
| ARAF      | 311010 | Noonan syndrome                        | H01738    |             | Ras pathway                              | map04010  | Activation   |
|           |        | Noonan syndrome and related disorders  | H00523    |             | Vascular smooth muscle contraction       | map04270  | Activation   |
| ARAP3     | 606647 | Lymphatic vascular development         | [129,130] |             | Rho and cytoskeletal remodelling pathway | map04015  | Activation   |
|           |        |                                        |           |             | PI3K/AKT pathway                         | [130]     | Activation   |
| PPP1R13B  | 606455 | Lymphatic vascular development         | [131]     |             | NFkB pathway                             | [132]     | Inactivation |
| CALCRL    | 114190 | ?Lymphatic malformation 8              | 618773    | AR          | Ras pathway                              | [124]     | Activation   |
|           |        |                                        |           |             | PI3K/AKT pathway                         | [124]     | Activation   |
|           |        |                                        |           |             | Vascular smooth muscle contraction       | map04270  | Activation   |
| CDH5      | 601120 | Lymphedema                             | [133]     |             | Rho and cytoskeletal remodelling pathway | [134]     | Activation   |
|           |        |                                        |           |             | Mechanotransduction                      | [99]      | Activation   |
|           |        |                                        |           |             | PI3K/AKT pathway                         | [79]      | Activation   |
|           |        |                                        |           |             | $\beta$ -catenin pathway                 | [79]      | Activation   |
| CDK5      | 123831 | Lymphatic vascular development         | [78]      |             | Transcription factors                    | [78]      | Activation   |
| CYP26B1   | 605207 | Lymphedema                             | [102]     |             | RA pathway                               | [102]     | Activation   |
| DCHS1     | 603057 | Lymphatic valve development            | [90]      |             | Hippo pathway                            | map04392  | Activation   |
| EFNB2     | 600527 | Lymphatic valve development            | [135]     |             | Lymphatic valve development              | [135]     | Activation   |
| EMILIN1   | 130660 | Lymphatic valve development            | [136]     |             | Lymphatic valve development              | [136]     | Activation   |
| FABP4     | 600434 | Lymphedema                             | [137]     |             | Macrophage recruitment/activation        | [106]     | Activation   |
| FLT1      | 165070 | Lymphatic vascular development         | [138]     |             | Ras pathway                              | map04014  | Activation   |
|           |        |                                        |           |             | PI3K/AKT pathway                         | map04151  | Activation   |
| FOXC1     | 601090 | Lymphatic vascular development         | [139]     |             | Transcription factors                    | [140]     | Activation   |
| FOXC2-AS1 |        | Lymphedema                             | [75]      |             | Transcription factors                    | [75]      | Activation   |
| GDF2      | 605120 | Lymphatic vascular development         | [141]     |             | Transcription factors                    | [82,142]  | Inactivation |
|           |        | Lymphatic valve development            | [141]     |             |                                          |           |              |
| GJA4      | 121012 | Lymphatic valve development            | [142]     |             | Lymphatic valve development              | [142]     | Activation   |
|           |        | Predisposition to secondary lymphedema | [143]     |             |                                          |           |              |
| HHEX      | 604420 | Lymphatic vascular development         | [144]     |             | Transcription factors                    | [144]     | Activation   |

|               |        |                                                        |        |     |                                          |          |              |
|---------------|--------|--------------------------------------------------------|--------|-----|------------------------------------------|----------|--------------|
| <b>HOXD10</b> | 142984 | Lymphatic vascular development                         | [145]  |     | Rho and cytoskeletal remodelling pathway | [145]    | Inactivation |
| <b>IKBKG</b>  | 300248 | Ectodermal dysplasia and immunodeficiency 1            | 300291 | XLR | Ras pathway                              | map04014 | Activation   |
|               |        |                                                        |        |     | PI3K/AKT pathway                         | map04151 | Activation   |
|               |        |                                                        |        |     | NFkB pathway                             | [146]    | Activation   |
| <b>ITGA5</b>  | 135620 | Lymphatic vascular development                         | [147]  |     | PI3K/AKT pathway                         | map04151 | Activation   |
| <b>ITGA9</b>  | 603963 | Lymphatic valve development                            | [148]  |     | PI3K/AKT pathway                         | map04151 | Activation   |
| <b>LCP2</b>   | 601603 | Predisposition to secondary lymphedema                 | [149]  |     | Rho and cytoskeletal remodelling pathway | [150]    | Activation   |
| <b>LPAR1</b>  | 602282 | Lymphedema                                             | [151]  |     | PI3K/AKT pathway                         | map04151 | Activation   |
| <b>LPAR2</b>  | 605110 | Lymphedema                                             | [151]  |     | PI3K/AKT pathway                         | map04151 | Activation   |
| <b>LPAR3</b>  | 605106 | Lymphatic vascular development                         | [152]  |     | Ras pathway                              | [153]    | Activation   |
|               |        | Lymphatic vascular development                         | [152]  |     | PI3K/AKT pathway                         | map04151 | Activation   |
| <b>LPAR4</b>  | 300086 | Lymphatic vascular development                         | [153]  |     | PI3K/AKT pathway                         | map04151 | Activation   |
| <b>LYVE1</b>  | 605702 | Lymphedema                                             | [154]  |     | PI3K/AKT pathway                         | map04151 | Activation   |
| <b>LZTR1</b>  | 600574 | Noonan syndrome 10                                     | 616564 | AD  | Ras pathway                              | [155]    | Inactivation |
|               |        | Noonan syndrome 2                                      | 605275 | AR  |                                          |          |              |
| <b>MAP2K1</b> | 176872 | Noonan syndrome and related disorders                  | H00523 |     | Ras pathway                              | map04014 | Activation   |
|               |        |                                                        |        |     | Vascular smooth muscle contraction       | map04270 | Activation   |
| <b>MAP2K2</b> | 601263 | Noonan syndrome and related disorders                  | H00523 |     | Ras pathway                              | map04014 | Activation   |
|               |        |                                                        |        |     | Vascular smooth muscle contraction       | map04270 | Activation   |
| <b>MAP4K4</b> | 604666 | Lymphatic vascular development                         | [156]  |     | Ras pathway                              | [157]    | Inactivation |
| <b>MET</b>    | 164860 | Lymphedema                                             | [27]   |     | Ras pathway                              | map04014 | Activation   |
|               |        |                                                        |        |     | PI3K/AKT pathway                         | map04151 | Activation   |
| <b>NFATC1</b> | 600489 | Lymphatic valve development                            | [158]  |     | Transcription factors                    | [158]    | Activation   |
| <b>NOTCH1</b> | 190198 | Lymphatic vascular development                         | [77]   |     | Transcription factors                    | [77]     | Inactivation |
| <b>NPPA</b>   | 108780 | Lymphatic vessels contraction and permeability         | [159]  |     | Vascular smooth muscle contraction       | map04270 | Activation   |
| <b>NPPB</b>   | 600295 | Lymphatic vessels contraction and permeability         | [159]  |     | Vascular smooth muscle contraction       | map04270 | Activation   |
| <b>NR2F2</b>  | 107773 | Lymphatic vascular development                         | [77]   |     | Transcription factors                    | [77]     | Activation   |
| <b>NRP1</b>   | 602069 | Lymphedema                                             | [160]  |     | Rho and cytoskeletal remodelling pathway | [127]    | Activation   |
| <b>NRP2</b>   | 602070 | Lymphedema                                             | [160]  |     | Rho and cytoskeletal remodelling pathway | [127]    | Activation   |
| <b>PDPN</b>   | 608863 | Lymphedema                                             | [161]  |     | Rho and cytoskeletal remodelling pathway | [60]     | Activation   |
| <b>PLCG2</b>  | 600220 | Lymphatic vascular development                         | [162]  |     | Ras pathway                              | map04014 | Activation   |
| <b>PLXNA1</b> | 601055 | Lymphatic valve development                            | [163]  |     | PI3K/AKT pathway                         | [164]    | Inactivation |
|               |        |                                                        |        |     | Rho and cytoskeletal remodelling pathway | [164]    | Inactivation |
| <b>PPP1CB</b> | 600590 | Noonan syndrome-like disorder with loose anagen hair 2 | 617506 | AD  | Hippo pathway                            | hsa04390 | Activation   |
|               |        |                                                        |        |     | Ras pathway                              | [165]    | Inactivation |
|               |        |                                                        |        |     | Vascular smooth muscle contraction       | map04270 | Inactivation |
| <b>PROX1</b>  | 601546 | Lymphedema                                             | [74]   |     | Ras pathway                              | [38]     | Activation   |

|                |        |                                       |        |    |                                          |          |              |
|----------------|--------|---------------------------------------|--------|----|------------------------------------------|----------|--------------|
| <b>RAF1</b>    | 164760 | Noonan syndrome 5                     | 611553 | AD | Ras pathway                              | map04014 | Activation   |
|                |        |                                       |        |    | Vascular smooth muscle contraction       | map04270 | Activation   |
| <b>RAMP2</b>   | 605154 | Lymphatic vascular development        | [123]  |    | Ras pathway                              | [124]    | Activation   |
|                |        |                                       |        |    | PI3K/AKT pathway                         | [124]    | Activation   |
|                |        |                                       |        |    | Vascular smooth muscle contraction       | map04270 | Activation   |
| <b>RELN</b>    | 600514 | Lissencephaly 2 (Norman-Roberts type) | 257320 | AR | PI3K/AKT pathway                         | map04151 | Activation   |
| <b>RORC</b>    | 602943 | Lymphedema                            | [83]   |    | Transcription factors                    | [83]     | Activation   |
| <b>S1PR1</b>   | 601974 | Lymphatic vascular development        | [61]   |    | Ras pathway                              | [166]    | Activation   |
|                |        |                                       |        |    | PI3K/AKT pathway                         | [166]    | Activation   |
|                |        |                                       |        |    | NFkB pathway                             | [166]    | Activation   |
| <b>S1PR2</b>   | 605111 | Lymphatic vessels contraction         | [167]  |    | Ras pathway                              | [166]    | Activation   |
|                |        |                                       |        |    | Rho and cytoskeletal remodelling pathway | [166]    | Activation   |
|                |        |                                       |        |    | PI3K/AKT pathway                         | [166]    | Activation   |
|                |        |                                       |        |    | NFkB pathway                             | [166]    | Activation   |
| <b>S1PR3</b>   | 601965 | Lymphatic vascular development        | [168]  |    | Rho and cytoskeletal remodelling pathway | [166]    | Activation   |
| <b>S1PR4</b>   | 603751 | Lymphatic vascular development        | [152]  |    | Ras pathway                              | [166]    | Activation   |
| <b>S1PR5</b>   | 605146 | Lymphatic vascular development        | [152]  |    | Ras pathway                              | [166]    | Activation   |
| <b>SDC4</b>    | 600017 | Lymphatic vascular development        | [169]  |    | Planar cell polarity                     | [170]    | Activation   |
| <b>SEMA3A</b>  | 603961 | Lymphedema                            | [171]  |    | Rho and cytoskeletal remodelling pathway | [172]    | Activation   |
| <b>SMARCA4</b> | 603254 | Lymphatic vascular development        | [173]  |    | Transcription factors                    | [174]    | Activation   |
| <b>SOS2</b>    | 601247 | Noonan syndrome 9                     | 616559 | AD | Ras pathway                              | map04014 | Activation   |
| <b>SOX17</b>   | 610928 | Lymphatic vascular development        | [175]  |    | Transcription factors                    | [175]    | Activation   |
| <b>SPRED1</b>  | 609291 | Lymphatic vascular development        | [38]   |    | Ras pathway                              | [38]     | Inactivation |
| <b>SPRED2</b>  | 609292 | Noonan syndrome-like phenotype        | [176]  |    | Ras pathway                              | [38]     | Inactivation |
| <b>SVEP1</b>   | 611691 | Lymphedema                            | [104]  |    | Cell adhesion                            | [104]    | Inactivation |
|                |        |                                       |        |    | PI3K/AKT pathway                         | [177]    | Activation   |
| <b>SYK</b>     | 600085 | Lymphedema                            | [137]  |    | PI3K/AKT pathway                         | map04151 | Activation   |
| <b>PECAM1</b>  | 173445 | Lymphatic valve development           | [100]  |    | Mechanotrasduction                       | [100]    | Activation   |
| <b>TACR1</b>   | 162323 | Lymphedema                            | [178]  |    | Ras pathway                              | [179]    | Activation   |
| <b>TIE1</b>    | 600222 | Lymphatic malformation 11             | 619401 | AD | PI3K/AKT pathway                         | [79]     | Inactivation |
|                |        |                                       |        |    | Ras pathway                              | [180]    | Inactivation |
| <b>VANGL2</b>  | 600533 | Lymphedema                            | [89]   |    | Planar cell polarity                     | [65]     | Activation   |
|                |        |                                       |        |    | Rho and cytoskeletal remodelling pathway | [65]     | Activation   |
| <b>VCAM1</b>   | 192225 | Lymphedema                            | [137]  |    | NFkB pathway                             | map04064 | Activation   |
